# Supplementary material for: The study of miRNA-211 affects melanogenesis progress in Cashmere goats via suppressing AP1S2
Source: Copernicus journal article supplement (doi:10.5194/aab-68-125-2025), 2025-02-11

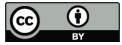

*Supplement of*

## **The study of miRNA-211 affects melanogenesis progress in Cashmere goats via suppressing *AP1S2***

**Baoyu Zhang et al.**

*Correspondence to:* Qiaoling Zhang (zql@jlu.edu.cn)

The copyright of individual parts of the supplement might differ from the article licence.

**Figure. S1.** AP1S2 protein strips. (a) Product AP1S2 (GeneTex) with strips located between 17kDa and 26kDa. (b) The original bands of AP1S2 in vitro transfection of miRNA-211 inhibitors/nc/mimics (three bands on the left) and in black and white Cashmere goats' skin (two bands on the right). (c) The supplementary bands of AP1S2 in vitro transfection of miRNA-211 inhibitors/nc/mimics (d) The supplementary bands of AP1S2 in the skin of black and white Cashmere goats. (e, f) The original bands of AP1S2 were observed in the skin injected anataomiR-211 and PBS.

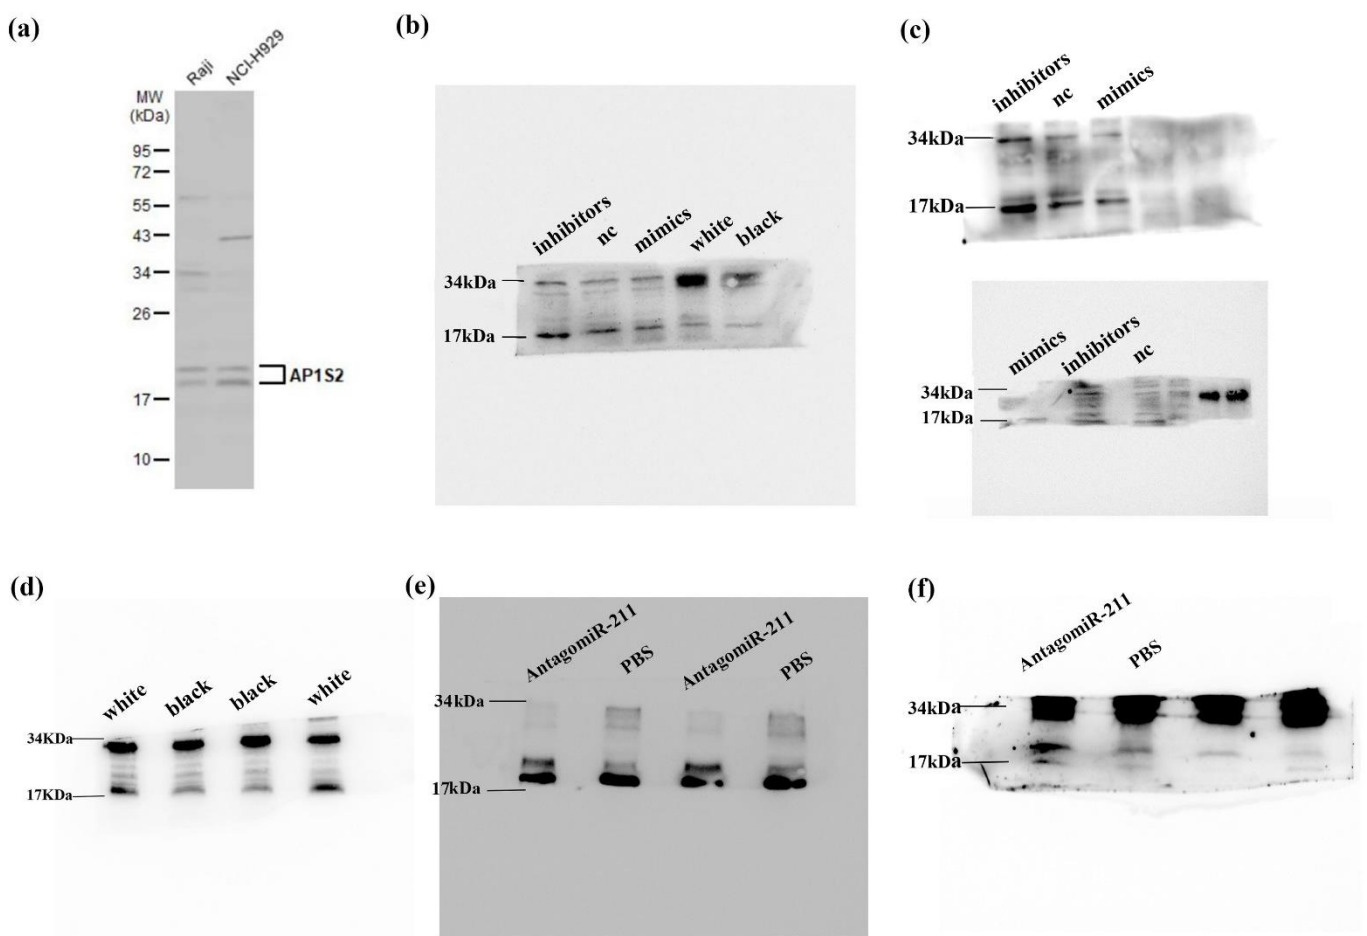

**Figure. S2.**  $\beta$ -Actin protein strips. (a) Product  $\beta$ -Actin (Proteintech) with strips located about 45kDa. (b) The original bands of  $\beta$ -Actin in miRNA-211 inhibitors/nc/mimics groups (left) and in black and white Cashmere goats' skin (right). (c) The supplementary bands of  $\beta$ -Actin in miRNA-211 inhibitors/nc/mimics groups. (d) The supplementary bands of  $\beta$ -Actin in the skin of black and white Cashmere goats. (e, f) The bands of  $\beta$ -Actin in the AnataomiR-211 and PBS groups.

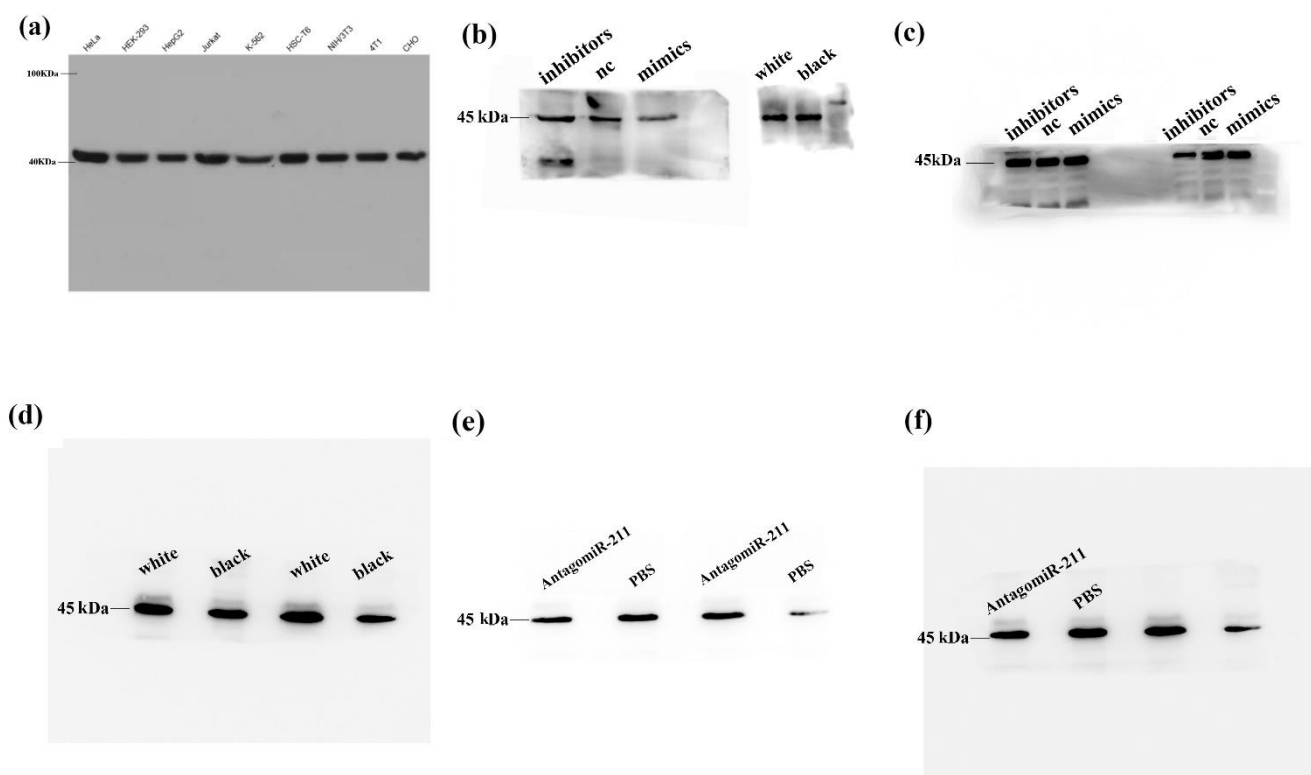

Supplement: Supplementary file [file aab-68-125-2025-supplement.pdf]
